# Supplementary material
Source: PubMed Central journal article supplement (PMC9202072)
Supplement: NIHMS1799488-supplement-Supplemental_Digital_Content_1.pdf [file NIHMS1799488-supplement-Supplemental_Digital_Content_1.pdf]

## Appendix 1. Professional Organizations and Their Level of Support for This Document

| Organization                                                 | Level of support  |
|--------------------------------------------------------------|-------------------|
| American Academy of Pediatrics (AAP)                         | Endorsement       |
| American College of Obstetricians & Gynecologists (ACOG)     | Support           |
| American Pediatric Surgery Association (APSA)                | Support           |
| American Society of Anesthesiologists (ASA)                  | Value recognition |
| Canadian Association of Pediatric Surgeons (CAPS)            | Endorsement       |
| Canadian Pediatric Society – Fetus & Newborn committee (CPS) | Endorsement       |
| Society for Maternal Fetal Medicine (SMFM)                   | Endorsement       |
| Society of Obstetricians & Gynecologists of Canada (SOGC)    | Endorsement       |
| International Fetal Medicine & Surgery Society (IFMSS)       | Endorsement       |
| Fetal Therapy Nurses Network (FTNN)                          | Endorsement       |
| North American Fetal Therapy Network (NAFTNet)               | Endorsement       |

Baschat AA, Blackwell SB, Chatterjee D, Cummings JJ, Emery SP, Hirose S, et al. Care levels for fetal therapy centers. *Obstet Gynecol* 2022;139.

The authors provided this information as a supplement to their article.

©2022 American College of Obstetricians and Gynecologists.
